# Supplementary material for: Widespread Endogenization of Genome Sequences of Non-Retroviral RNA Viruses into Plant Genomes
Source: PubMed Central journal article supplement (PMC3136472; doi:10.1371/journal.ppat.1002146), 2011-07-14
Supplement: ppat.1002146.s002.pdf [file ppat.1002146.s002.pdf]

CLUSTAL format alignment by MAFFT (v6.851b)

```

RnPV2W57-CP      -----MSTPS-----VTLSAFKAAVAKSGLEDQFLKLTGLTSMDELSADNFNE
FestucaEST       -----MSSKTNASIESRLAAAKAAVRELGFEDQFLKQTGLTSLDELDPKQFDD
MgPCLS1          -----M-----
AtPCLS1          -----M-----
AtPCLS1_No       -----M-----
AsPCLS1          -----M-----
AtPCLS1_C24      -----M-----
AaPCLS1-A        -----M-----
AaPCLS1-B        -----M-----
CrPCLS1          -----M-----
CbPCLS1          MIFSLLRKRITM-----
OkPCLS1-A        -----M-----
OpPCLS1-A        -----M-----
OkPCLS1-C        -----M-----
CPCV-CP          -----M-----SLSSGPVSQAV
FvBV-CP          -----M-----
SsPV-S-CP        -----M-----SSRSARKVSTQEKTSQSGKNRAS
CCRS-PV-CP       -----M-----SAPATTGSTTSTAS
ACD-PV-CP        -----M-----SAPATTGSTTSTAA
WCCV-CP          -----M-----NQDTPLANLNGPEVPS
CCV-CP           -----M-----DDNTPAAQPNGPHAPA
BCV-CP           -----M-----ENNTPLANPSGPNVPS
VCV-CP           -----M-----EAHTPAADVNGPNIPS
BrPCLS4          -----M-----
BnPCLS4          -----M-----
BoPCLS4          -----M-----
RSCV1-dsRNA3     -----MA--N-----PNNNQELNVLAPHVEIPPPPPQIGVADAI PVVAAQQ
BrPCLS5_Cc       -----M-----
BrPCLS5_tu       -----M-----
BnPCLS5          -----M-----
BoPCLS5          -----M-----
SpPCLS5          -----MA-----QDGalPLQDAALNVNVP LNLF GFI G VAD PARNMVAER
StPCLS5          -----MA-----QDGalPLQDAALNVNVP LNLF GFI G VAD PARNMVAER
SlPCLS5          -----MA-----QDGalPLXLD TALNVN LXNLVGS I G VAD PARNMVAEH
NtPCLS5-1        -----M-----XGVGVANPTRDLVAER
RSCV1-CP         -----MAHRT-----PTNAPALPQVDGINPNLPPNDPGTVAAAPNARNLHLER
HetRV3-ec1-CP   -----M-----SSIPDFASMNESDRLK YFEE
RSCV3-CP         -----M-----
MdPCL7           -----MEDDSF-----
BCV2ds1-CP      -----M-----
BCV2ds2-CP      -----M-----
FCCVds2-CP      -----M-----ATDNND
RoCVds2-CP      -----M-----DKDAAA
RSCVds2-CP      -----M-----AFE
MePCLS2          -----M-----AANNPD
FCCVds3-CP      -----M-----ASPRDSMMTTA
RoCVds3-CP      -----M-----ASSKRTPPLVA
SbPCL8           -----M-----KPTDATGKDAGTSA
RSCVds3-CP      -----M-----DTAQ

RnPV2W57-CP      KFGQADSLTKSILA-----PSAAPVPHQEQK-----KE
FestucaEST       SAPYAPTKLKPS-----TSGAPKPSKELT-----RS
MgPCLS1          -----M-----A
AtPCLS1          -----M-----
AtPCLS1_No       -----M-----
AsPCLS1          -----M-----
AtPCLS1_C24      -----M-----
AaPCLS1-A        -----M-----
AaPCLS1-B        -----M-----
CrPCLS1          -----M-----
CbPCLS1          -----M-----
OkPCLS1-A        -----M-----
OpPCLS1-A        -----M-----
OkPCLS1-C        -----M-----
CPCV-CP          LTASEPAVPAPVEYRPGATQPDATG-----TMTQTASGTANAIFQSGATTAPE
FvBV-CP          -----SPPRFKPPVTPSASQTADPLG-----TRDVDESSKPKLVNSRPQKAVP
SsPV-S-CP        KKSGKKSAPPEYSVDTTPSEQSDVESDILSELEVSDADDASREVPASKSKKGTTRNKKKEK
CCRS-PV-CP       VPATEQTAPASVAVPPTAPATDVKY-----VAPAKKQKSFAP-----RE
ACD-PV-CP        VPATEQTAPATVAAPPTAPATDVKY-----VAPAKKQKSFAP-----RE
WCCV-CP          GNVPPANPPGRTNVAPPAQGAVQQ-----PPAPAARRARNP-----HG
CCV-CP           AAAPHAVPPPAPATPAPGAVQQ-----PPAPARRSRNP-----HG
BCV-CP           AAAPPTAPPAIPQATPTPGAVSQ-----PPAPPARRSRTP-----RG
VCV-CP           GAVSQPEIAPHNQAAPNVSGAAQA-----IIAPTARKRTP-----HG
BrPCLS4          -----M-----HPHASRHRDTP-----RG
BnPCLS4          -----M-----HPHASRHRDTP-----RG
BoPCLS4          -----M-----HPHASRRDTP-----RG
RSCV1-dsRNA3     QQVIDQAANAAA-----AQVARFEAEHA-----QA
BrPCLS5_Cc       -----M-----
BrPCLS5_tu       -----M-----
BnPCLS5          -----M-----

```

BoPCLS5 -----  
 SpPCLS5 DQEAQRDRVVAI-----AHCPRFEARSC-----L  
 StPCLS5 DQEAQRDRVVAI-----AHCPRFEARSC-----L  
 SlPCLS5 NQEAQRDRVIA-----CHXPRFEARSC-----L  
 NtPCLS5-1 DQEAQRDGAEAA-----AKRQRFQARRL-----QV  
 RSCV1-CP EQEARQDRAAAA-----FVFNTRFAVRRP-----TI  
 HetRV3-ec1-CP QQKKQKELIDQSIKSKQTM SAMRVR-----PVFQQARNNVTSVNTSSSVPTKA  
 RSCV3-CP -----ENGANNP  
 MdPCL7 -----  
 BCV2ds1-CP -----  
 BCV2ds2-CP -----  
 FCCVds2-CP AKTEQSKVTESEKGS SPTKSLPAHAA-----DEKAAVGATFKLQSRQPTEPPAI  
 RoCVds2-CP AQTEQSKITESHGSSPEKNA AHAHTA-----DQKAAVGSTFLQSRKPTPEPTV  
 RSCVds2-CP SKTSASESTVNKDAAPAPSSA-----SVKSPVKPSSSGLGRAKTETPHL  
 MePCLS2 ASADLSQETPKNTRVPSR GSA-----AAIAPQTPSIGARKTEATTPPHL  
 FCCVds3-CP QDAKKRKRKSHILSP IRMIEPAAQSL-----AII PVVPOV-----QMDDAEA  
 RoCVds3-CP QQPKRRRFETVFDL GPSL GSTSLAM-----VHVPQFTPM-----LTDEAEQ  
 SbPCL8 DQSKRQATRQTLAMGPPT ANDNPMPL-----ETLPELLDSVEP-----  
 RSCVds3-CP TDADKAAGKRGATVPPEGE PAAKTM-----RFSDAIVPAGFSKDASTVATAAL

RnPV2W57-CP DADAKRVSAPVSASDF-----LYGFKHMT-IQYASRKKNNFLPSAFMMMY-I IH  
 FestucaEST DVDTSDDYTPESASDM-----LMPYLGLN-LRYVSRQRPSRYAPSSHMDY-IVH  
 MgPCLS1 EASTGLNSTAAASDVM-----LRPYAGLHIITSASKKKPSTYRPSLMDY-I IH  
 AtPCLS1 -----ASESSTHKTLEKKTCLSFLSSFTRSQ-IVYPTQG-ISHYYP SCHMM---VH  
 AtPCLS1\_No -----ASESSTHKTLEKKTCLSFLSSFTRSQ-IVYPTQG-ISHYYP SCHMM---VH  
 AspCLS1 -----ASESSTHKTLEKKTCLSFLSSFTRSQ-IVYPTQG-ISHYYP SCHMM---VH  
 AtPCLS1\_C24 -----ASESSTHKTLEKKTCLSFLSSFTRSQ-IVYPTQG-ISHYYP SCHMDY-IVH  
 AaPCLS1-A -----ASESSTAKTKLEKKTSLSLHGFTRGR-IVYPTQGRLSYSPSCHMDY-IVH  
 AaPCLS1-B -----ASESSTAKTKLEKKTSLSLHGFTRGR-IVYPTQGRLSYSPSCHMDY-IVH  
 CrPCLS1 -----ASESSAAKM-----LSFFYGVGTG NR-IVHPTHGRLSHYYP SCHMDY-VVH  
 CbPCLS1 -----ASESSAAKM-----LSFFYGVGTG NR-IVHPTHGRLSHYYP SCHMDY-IVH  
 OkPCLS1-A -----ASESIAKM-----LSLFYG-SGRR-FGYPNQDRLSHYYP SCHMDY-IVH  
 OpPCLS1-A -----ASESIAKM-----LSLFYG-SGRR-FGYPNQDRLSHYYP SCHMDY-IVH  
 OkPCLS1-C -----ASQSS TAKM-----LSLFYG-SGSR-IVHPTQGGLSHYYP SCHLMDY-IVH  
 PCPV-CP QPVLIIHVSDDAKSNE---KMSAIDITRI AICYMSTDSVLVPSWFLPSSRYLYR-IVQ  
 FvBV-CP RAGPTSAPSVSDANPI-----YHAVSNFP-YYPHQLDTSTFVPCTQVLFV-VLA  
 SsPV-S-CP SVASSAGSSIPPYMM-----LTALNFFS-LTEIEHVTISTYTPSCWSMYA-VLD  
 CCRS-PV-CP PTATSSGGPKNPGLSMM-----LSGVSDLP-FFGIKHNDVSVVVPD TTQLFY-VLS  
 ACD-PV-CP PTASSAGPKNPGLSMM-----LSGVSDLP-FFGIKHNDISYVVPD TTQLFY-VLS  
 WCCV-CP PVPFAGPSRSAGAPAM-----LELSAAYP-MYTEQRRA PNYVYVDAQLLFH-TLG  
 CCV-CP PTFISSRVSAPSAPAL-----LELPAATP-MYTEQRRSANFFVDPDAQMLFH-VLS  
 BCV-CP PVPQATPGSTSGAPAL-----LELSAGLP-MYTVPRRGVNTFVPDAQMLFH-VLG  
 VCV-CP PIPAATSSGNTSAPAL-----LELAAAYP-MYTEQRRSFNFFIPDSQMMFH-SLG  
 BrPCLS4 PVPQSPNHNIAPKNAM-----LEIAASQP-YITVHPPRFNSFVPDAQMLFH-VLG  
 BnPCLS4 PVPQSPNHNIAPKNAM-----LEIAASQP-YITVHPPRFNSFVPDAQMLFH-VLG  
 BoPCLS4 PVPQSPNHNIAPKNAM-----LEIAASQP-YITVHPPRFNSFVPDAQMLFH-VLG  
 RSCV1-dsRNA3 QT--RAATAKNYSTLI-----CGPAAMIH-PVKDQYPEVSTFTPNFSTSYQ-YLN  
 BrPCLS5\_Cc -----DNIHNAM-----CATAANFR-LTKVIYPAISTFTPCFISIFY-YLN  
 BrPCLS5\_tu -----DNIHNAM-----CATAANFR-LTKVIYPAISTFTPCFISIFY-YLN  
 BnPCLS5 -----DNIHNAM-----CATAANFR-LTKVIYPAISTFTPCFISIFY-YLN  
 BoPCLS5 -----DNIHNAM-----CATAANFR-LTKVIYPAISTFTPCFISIFY-YLN  
 SpPCLS5 APPFRGLADPNIE TAI-----LASASNFP-IQRITYPGESTFIPCFISVLY-YLN  
 StPCLS5 APPFRGLADPNIE TAI-----LASASNFP-IQRITYPGESTFIPCFISVLY-YLN  
 SlPCLS5 APPFRGLADPIIETAF-----LAYASNFR-ILRITYPGESTFIPCFISILY-YLN  
 NtPCLS5-1 EP--PARHDP AIE TAI-----AATAVNFP-LTRMYPNRVSTYIPCFATILY-YLN  
 RSCV1-CP RP-SPAHSAPDLETAL-----FDSAVNHP-PTPVSYPSTSSYIPNFTSAFY-YLN  
 HetRV3-ec1-CP VPPQPFSGTSSSANNM-----LRLAFGENP-FRPKQRFQNGFV PDSQHLFA-LLS  
 RSCV3-CP PAAGAI VAAVQPALPPGLDASKLN RATEYLYDAD-KIRPHRARS PKYRYRMQLKNEIYV  
 MdPCL7 -----KDSL SRATKYALEAG-CIRLRKE--RVTRCVNLHLQ TIFD  
 BCV2ds1-CP -TGPTQAH LIEATSFTGLNRDELDS IVDALQEEN-QIGTFRDRPKAYRRYVHVSQELFD  
 BCV2ds2-CP -----APNDELAANLQGLKRPALDEIVHYLED RN-QIGISHDKNLSYNRTC VLLTNELHA  
 FCCVds2-CP PS----VFAQS QSLNDSVGNPDFIAQLRDEGMYG-LFLPRDRARRTPVT LRLPLT-YFQ  
 RoCVds2-CP PS----AFAQSTALNVSVGNADY IAEQRDEGKYG-LFLPRDRAHREPEPVTMIVGN-FFD  
 RSCVds2-CP PASNYEIPRYTRDTQPVVGNKNYFSLRMDGRLG-HSMDRSKTARPEVNC SLNRAN-FHE  
 MePCLS2 FT----AFEVASEEEVVGNPKLVF SCKQEGVLG-VFFDRDSDVVDPTPIIINGNN-MRN  
 FCCVds3-CP MAELLYRERARIE LDI---NPAYISRLESRREIG-FYPPVASKNVPTFTFNIDVAE-FRR  
 RoCVds3-CP MAELLFRRERSRIELDI---NPAYVSELELRREVG-FSPMIANKTLAFTTYDLRVVE-FRR  
 SbPCL8 -----SYLNTATKELARQILEINFTE-LRR  
 RSCVds3-CP PKDLIQWPIERLATQV---NQVFLD TTIQNGEGG-YEVPDQIVPTLRVYEINVTN-LRN

RnPV2W57-CP EMNVL-----LCEHYF--KREAPNY-----HPLLRLTYFG  
 FestucaEST LINDL-----LCDNFYF--KRSCP DY-----HPYILRLYYG  
 MgPCLS1 QTN DL-----LVDPHF--RRSPDY-----HPYILRLYYG  
 AtPCLS1 AMNIT-----LCDNFDF--KRANPNY-----HPYILRLYCG  
 AtPCLS1\_No AMNIT-----LCDNFDF--KRANPNY-----HPYILRLYCG  
 AspCLS1 AMNIT-----LCDNFDF--KRANPNY-----HPYILRLYCG  
 AtPCLS1\_C24 AMNST-----LCDNFDF--KRANPNY-----HPYILRLYCG  
 AaPCLS1-A AMNIT-----LCDNFDF--QRANPNY-----HPYILRLYCA  
 AaPCLS1-B AILLT-----LHFVII LISNGPTPNY-----HPYILRLYCG  
 CrPCLS1 SMNIT-----LCDNFDF--KQANPY-----HPYILRLYCG  
 CbPCLS1 SINIT-----LCDNFDF--KQANPY-----HPYILRLYCG

OkPCLS1-A AMNTT-----LCDNFDF--KWANPNY-----HPYILRLYCG  
 OpPCLS1-A AMNTT-----LCDNFDF--KWANPNY-----HPYILRLYCG  
 OkPCLS1-C AMNIT-----LCDNFDF--KWANPNY-----HPYILRLYCG  
 CPCV-CP EMDII-----MLNTHRF--TQSVHAW-----SPLVSRVYIA  
 FvBV-CP HMDNI-----MCTTYSW--TQSQPAW-----HPCVSRLYFS  
 SsPV-S-CP AMHDL-----VGDNASL--RRFCPEY-----HVALSNIYYG  
 CCRS-PV-CP IMDTQ-----MARTKRF--TDANPDW-----HPFVSQLYIA  
 ACD-PV-CP IMDTQ-----MVRTKRF--TDANPDW-----HPFVSQLYIA  
 WCCV-CP VCDQL-----MTTDRF--LRSMPSW-----LPIVSQLYVS  
 CCV-CP ICDQM-----MNSTERF--LRSSPAW-----MPIVSQLYIS  
 BCV-CP ICDQM-----MLSTDRF--TRSSPAW-----IPIVSQLYIS  
 VCV-CP ICDSM-----MNSTDRF--LRSSPAW-----LPIVSQLYIS  
 BrPCLS4 ICDQL-----MLTTTQF--IRSSPSW-----LPIVSQLYIS  
 BnPCLS4 ICDQLMLTTTSMMLTTTQF--IRSSPSW-----LPIVSQLYIS  
 BoPCLS4 ICDQL-----MLTTTQF--LRSSPSW-----LPIVSQLYIS  
 RSCV1-dsRNA3 LMDQS-----MISTKRW--TDNCLGW-----APPYSQIYIG  
 BrPCLS5\_Cc SMDHL-----MTSTKRW--TNNCMDW-----VPPYSQIYIA  
 BrPCLS5\_tu SMDHL-----MTSTKRW--TNNCMDW-----VPPYSQIYIA  
 BnPCLS5 SMDHL-----MTSTERW--TNNCMGW-----VPPCSQLYIA  
 BoPCLS5 SMDHL-----MTSTERW--TNNCMGW-----VPPCYQLYID  
 SpPCLS5 QMDHL-----MVSTKRW--TDNCMGW-----VPPYSQIYIS  
 StPCLS5 QMDHL-----MVSTKRW--TDNCMGW-----VPPYSQIYIS  
 SlPCLS5 QMDHL-----MVSTXRW--TDNCMGW-----VLPYSQIYIS  
 NtPCLS5-1 CMDFL-----MAATKRW--TDNCLGW-----VSPYSQIYIS  
 RSCV1-CP KMDSL-----MVQTLNW--TNNCSGW-----VPPYSQIYIS  
 HetRV3-ecl-CP VMDAK-----MASTRKF--VGECEFW-----TPLVSYIYLS  
 RSCV3-CP QLIDI-----YRASFSV-----TWPDFRHLI--HAFPPPANHEP----QTYIACCYIS  
 MdPCL7 QLVSL-----YIPLFQC-----QWRRLKYLFEESALLPSGVTP----WIHATRCYIS  
 BCV2ds1-CP RLSEL-----YADLFTS-----NWSAFKHAYITEPTGREDANSISTKASEFMAQCYLT  
 BCV2ds2-CP RLVTL-----YTNLFTT-----SWRHFKSAV-RKEMPRTANP----QRWLANCYIT  
 FCCVds2-CP STERT-----ISQSMFH-----LLQTKTEFNNDDAIQRINTIAEQLAIGACLATHMK  
 RoCVds2-CP GIVRT-----TERAMVY-----LLQKSEFNIDIVLQVRHAVAQELAIGAMLATYFK  
 RSCVds2-CP GVLKV-----LRQILSE-----MARLKQDLSDAEIQERVESVSLTAYGVATMAYLK  
 MePCLS2 AVIAT-----LTTVLTR-----ALKDFGVTSVHTMALETAATLANGVMIATFLK  
 FCCVds3-CP CITHV-----LTAALKV-----RYYDRSNLRNAEINTEINTIVPRTVSAACMAVYAK  
 RoCVds3-CP CITAV-----LTGALKA-----RYFDRSNLRQAEITAEINTIVPLTVSACMCAYSK  
 SbPCL8 CMANV-----LNHSLTI-----LYFDGSGMRDADINTELKVIVPVTIVCAXTALYAK  
 RSCVds3-CP AFRSV-----LYTILRA-----KFIERGDRVTVAATTLATNVSNLTADACMAALYAK

**PGPLe x xE**

RnPV2W57-CP ILFIIQTLRAQHAANN--LFGDQF--EFLEKFLDAYP---VDTLPPIAPLI---H-IFK-  
 FestucaEST VLFWIIQCLRAARDVRV--LEDEEY--QFLMRFLDAYP---LESLSITSSPLL---V-IFK-  
 MgPCLS1 ILFWIIQCLRAAAAVQA--LNSDQH--QTLTRFLSAFP---PDSLTISSPLL---Y-LFK-  
 AtPCLS1 VLFWIIQCLRAGNDVND--LTDVQH--RFLNRFLDNHP---LET LAVPGPLL---G-LFK-  
 AtPCLS1\_No VLFWIIQCLRAGNDVND--LTDVQH--RFLNRFLDNHP---LET LAVPGPLL---G-LFK-  
 AsPCLS1 VLFWIIQCLRAGNDVND--LTDVQH--RFLNRFLDNHP---LET LAVPGPLL---G-LFK-  
 AtPCLS1\_C24 VLFWIIQCLRAGNDVND--LTDVQH--RFLNRFLDNHP---LET LAVPGPLL---G-LFK-  
 AaPCLS1-A VLFWIIQCLRAGNDVNA--LTDVQH--RFLNRFLDNHP---LET LAVPSPLL---R-LFK-  
 AaPCLS1-B VLSWIIQCLRAGNDVNA--LTDVQH--RFLNRFLVNHHP---LENSRCSRALSS---SDSFK-  
 CrPCLS1 VLFWIIQCLRAGNNVNA--LTDVQY--RFLNRFLNHP---LET LAIPGPLL---E-LFK-  
 CbPCLS1 VLFWIIQCLRAGNNVNA--LTDVQY--RFLNRFLDNHP---LET LAIPGPLL---E-LFK-  
 OkPCLS1-A VLFWIIQCLRAGNDVHA--LTDQDQ--KFLNRFLDNYP---VETLVVPCPLL---E-LFK-  
 OpPCLS1-A VLFWIIQCLRAGNDVHA--LTDQDQ--KFLNRFLDNYP---VETLVVPCPLL---E-LFK-  
 OkPCLS1-C VLF-IQCLRAGNDVHA--LTHDEH--KFLNRFLDNYP---METLVVPGPLLGRPE-FPKH  
 CPCV-CP VLFWIIQTRCQMATGF--LPREGI--AFINELLQDFP---ARTLVVPGPLV---S-LFR-  
 FvBV-CP TLVYYQILRAMDAARI--ITVLQK--ELLNFLEHTIP---ASALPIPGPLA---P-FLR-  
 SsPV-S-CP IIFIIQVLRANQVANN--LSQADF--QFLRFESNFA---LEELPVAGPLV---L-FFQ-  
 CCRS-PV-CP VLFYIYQVLKNQSHGGM--ISNDQR--LFVDFLDTQFK---AEHLKIPGPIA---I-FFQ-  
 ACD-PV-CP VLFYIYQVLKNQSHGGM--ITNDQR--LFVEFLDSQFK---AEHLKIPGPIA---I-FFQ-  
 WCCV-CP VLWNVMLKVYVNTGY--GAAYAH--DLVLLNHLQ---INECMIPGPLV---P-FFQ-  
 CCV-CP VLWNVMTIHVFNVNSGY--GSAFSS--FTELYSVLR---IDECMIPGPLV---P-FFQ-  
 BCV-CP VLWNVAILRVFVASGY--GALYSS--LINDLIGHLR---IDECMIPGPLV---P-FFQ-  
 VCV-CP VLWNVMIIRILSHTGY--APSFTD--LLNTLTDLQ---IEECMVPGLV---P-FFQ-  
 BrPCLS4 LLWNFTILRNFBVSSRL--GSFSQY--YQILNELEF-----LKHCIIVPGPLV---S-FFQ-  
 BnPCLS4 LLWNFTILRNFBVSSRL--GSFFQY--YQILNELEF-----LKHCIIVPGPLV---S-FFQ-  
 BoPCLS4 LLWNFTILRNFBVSSRL--GSFFQY--YQILNELEF-----LSXCIVPGPLV---S-FFQ-  
 RSCV1-dsRNA3 TLGYIQTMRAMNAAGL--LEPNSEISRLLGDNFMKVFPP---LKSLWIPGPLV---S-FFK-  
 BrPCLS5\_Cc MLLYIQTMRAMEASGY--LSRGSELSLLGDFCNQFP---LQNLWIPGPLV---Y-AFK-  
 BrPCLS5\_tu MLLYIQTMRAMEASGY--LSRGSELSLLGDFCNQFP---LQNLWIPGPLV---Y-AFK-  
 BnPCLS5 MLLYIQTMRAMQASGY--LSPGSEISSLLGDFCYLFP---LQNLWIPGPLV---D-AFR-  
 BoPCLS5 MLLYIQTMRAMQASGY--LSPGSEISSLLGDFCYLFP---LQNLWIPGPLV---D-AFR-  
 SpPCLS5 ILLYIQVIRAMDSAGI--FRFGSRLSIFLREFETLFP---FTNLWIPGPLV---S-AFK-  
 StPCLS5 ILLYIQVIRAMDSAGI--FRFGSRLSIFLREFETLFP---FTNLWIPGPLV---S-AFK-  
 SlPCLS5 ILLYIQVIRGIDSAXI--FRIGSRPLIFLRELETLFP---FTNLWIPGPLV---S-TFK-  
 NtPCLS5-1 VLFYIQVMRAMESSDT--LRLGSDISLFLREFLILYP---LEDLVRVPGPLV---Y-GFK-  
 RSCV1-CP MLLYLQVMRAMKKAGV--LRPNSELSHLFNEMSTIFP---FESLMVPGPLV---N-LFE-  
 HetRV3-ecl-CP VLIIFIQVARAKHEAGL--LSGELA--DVYDLFCGHSPAINLNALPVPGPFL---N-MLS-  
 RSCV3-CP GWFRLDYHIRKALKS--LSGLAE--LEYRDRPIP-----QMSFEYDNFLA-  
 MdPCL7 AWIHDLYVSNREAVQT--LCSLTF---LKHYSHEEV-----YCSSEYDAFLI-  
 BCV2ds1-CP AWFWDTQYCIRESVRK--LSGTAY---NQHFTEDLN-----LISPKYDPFLQ-  
 BCV2ds2-CP AWFWDLQASIQEATKT--LSGKIY---QDYFRDNIH-----PILDRYDFPFLQ-  
 FCCVds2-CP -LRALIHLDFPDRYNIIGSLKRPKT-----ITDLPVVAPFA---F-AIQ-  
 RoCVds2-CP -LRALIYLDLPDRYTLGSLKRPKA-----IADLPVIAPFA---F-AIQ-

RSCVds2-CP -LRAINLFRPNEASKF--LTKPKV-----PDHFEIPTPFA---F-AIS-  
MePCLS2 -LRSVGYLNSSLSMRF--YVVPRT-----PQFFELPLPYA---L-AIS-  
FCCVds3-CP -LRSIHRTHGTLRNRV--VTTPTY-----NKDIELPLPLA---I-AIQ-  
RoCVds3-CP -LRSIHRTHGRLSARY--AAAPHY-----NKDIELPLPLA---V-AIQ-  
SbPCL8 -LYNIHHYGVHPSRY--LTPPSF-----AKEIELPLPLA---L-LIE-  
RSCVds3-CP -LRSLHRQIYTHKGRF--TDQPTY-----TKDVELPLPFA---V-AID-

RnPV2W57-CP -SLCSS-R-PEIP--QYGYV--TPFVPEEL-WGTQLKSPANALY-A---RNFFPNIPYI  
FestucaEST -TLCSS-Q-PEFP--TYGKV--YPALPSLP--GPTRRDEFMHEHV-D---NFFVNPVPGI  
MgPCLS1 -TLCSSPPPPENP--SYGKV--YPLLPSP--GPTARSAFMSNSP-Y---HYIIPNIPGI  
AtPCLS1 -TLCSS-Q-PEFPHNHNGKV--YPRIPAQP--GPARRDAFMRDLL-E---SHFLPNVPGI  
AtPCLS1\_No -TLCSS-Q-PEFPHNHNGKV--YPRIPAQP--GPARRDAFMRDLL-E---SHFLPNVPGI  
AsPCLS1 -TLCSS-Q-PEFPHNHNGKV--YPRIPAQP--GPARRDAFMRDLL-E---SHFLPNVPGI  
AtPCLS1\_C24 -TLCSS-Q-PEFPHNHNGKV--YPRIPAQP--GPARRDAFMRDLL-E---SHFLPNVPGI  
AaPCLS1-A -TLCSS-Q-PEFPHNHNGKV--YPRIPAQP--GPARRDAFMRDLL-E---SHFLPNVPGI  
AaPCLS1-B -TLCSS-Q-PEFPHNHNGKV--YPRIPAQP--GPARRDAFMRDLL-E---SHFLPNVPGI  
CrPCLS1 -TLCSS-Q-PEFP--HNGKV--YQIIPAQP--GPARRDAFMGNLL-E---SYFLPNVPGI  
CbPCLS1 -TLCSS-Q-PEFP--HNGKV--YQIIPAQP--GPARRDAFMGNLL-E---SYFLPNVPGI  
OkPCLS1-A -TLCSS-L-PEFH--YSGKV--YPRILAQP--GPARRDSFMRCHL-E---SYFLPNVPGI  
OpPCLS1-A -TLCSS-L-PEFH--YSGKV--YPRILAQP--GPARRDSFMRCHL-E---SYFLPNVPGI  
OkPCLS1-C GHSCSS-Q-PEF-----PCIPSPQ--GPARRDSFMRCHL-E---SYFLPNVPGI  
CPCV-CP -SLCAS-S-PSFG--TYGDV--FPAFETAG-IGASPANCFTLNSAREFPQWYMLMPNVALL  
FvBV-CP -SFLLFN-----WHGWL--LQCMSNHTXWPHHQIKIYNISSA-F---NNLLPNLVHA  
SsPV-S-CP -NLAAF-K-PDGN--RFNWV--VPHYNYG--PANGANSRPNVAQ-----STALPQLPQM  
CCV-VP-CP -SLAAN-A-GPNE--NFGNL--VFGIPNAH---DISCTSYLWQDK-V---HTILPNVIFI  
ACD-PV-CP -SLAAN-A-GPNE--NFGNL--VFGIPNAH---DINCTSFLWQDK-V---HTILPNVIFI  
WCCV-CP -SLAAV-N-GPFD--WIGDI--IPAMPSFT--ELW-TDEFAPHA-A-Y---ARQIPIPAIL  
CCV-CP -ALGAV-N-GPFD--WIGDI--VGLPNFS--ALWNEAGFHANNN-Y---VRQVPIPAVI  
BCV-CP -SLGAV-C-GPYE--WIGDI--VAAFPDEL--TLWDAENFCPTAD-L---ARTCPVPAIM  
VCV-CP -SLAST-N-GPFD--WIGDI--TPALPGFD--SLWDATNFTPHAS-Y---TRFVPIPAIL  
BrPCLS4 -SLSSF-N-GRFF-----DI--TPIIPDFT--SLWNASAFHINAD-Y---ARQIPITAI  
BnPCLS4 -SLASF-N-GRFF-----DI--TPIIPDFT--SLWNASAFHINAD-Y---ARQIPITAI  
BoPCLS4 -SLASF-N-GRFF-----DI--TPIIPEFT--SLWNASAFHINAD-Y---ARQIPITAI  
RSCV1-dsRNA3 -SIACF-KPSASE--KHGMV--SPTLPTRP--GWSRNRRIYRIVTD-A---SHLPNINIF  
BrPCLS5\_Cc -SVSCF-SPSASG--RFGNV--TPALPATP--GWSRARRYRIADA-A---TTHLPNINIF  
BrPCLS5\_tu -SVSCF-SPSASG--RFGNV--TPALPATP--GWSRARRYRIADA-A---TTHLPNINIF  
BnPCLS5 -SVACF-SPSASR--RFGNI--TPALPSSP--GWSRARRYRIADA-A---TTHLPNINIF  
BoPCLS5 -SVACF-SPSASR--RFSNV--TPAIPSSP--GWSRARRYRIADT-G---TTHLSNINIF  
SpPCLS5 -NLSCF-WPSATG--QFGNV--SPLPATP--EWTQANRFSFANR-F---ASHLPNISIF  
StPCLS5 -NLSCF-WPSATG--QFGNV--SPLPATP--EWTQANRFSFANR-F---ASHLPNISIF  
SlPCLS5 -NLSCF-WPSATG--QFGSV--SPLPXTP--KWTQAHRSFSGSR-F---ASHLPNISIF  
NtPCLS5-1 -NLSCF-WPSADN--SFGNV--SPPLPAGP-----DRRYAFNNA-F---ASHLPNISLQ  
RSCV1-CP -NITAF-RPLQTD--SFGNV--TPFLPAEP--GWSNATFFAPNGS-L---VRHLPHIPAL  
HetRV3-ecl-CP -QVAAH-I-PHLV--DMDNI--CPIVNNL--EATNTSYLYTGQ-QNLRGRLEPLVPI  
RSCV3-CP -LLGAA-IRPTHIVGNPDEVMYVPLISEAT---DVNQVNPFGINN-Y---VHQPELFSAI  
MdPCL7 -HLNAD-IRPTHIKGTPEDTVYVPLSDSP---AWGTANPNFIEN-F---VLDRLNVRGI  
BCV2ds1-CP -HLNMV-IRPTLIHQSTEDTLYIPLLGQTF-NYNEDAYNFINLQGC---GTEIRQVYAI  
BCV2ds2-CP -HLNTI-1KPTHIVNATEDVLYFPIISADY--RRADADMNIHRTIG-A---FTRPNVMDL  
FCCVds2-CP -QLGYV-NIANLT--EERRY--VPVLPET-----  
RoCVds2-CP -QLGYV-NVANLT--RERRF--VPVFPED-----  
RSCVds2-CP -QLGVV-EVSSLS--RRMIC--YPTADLAD-----  
MePCLS2 -QLGAV-KTHGSP--QEGYY--CPTIPAT-----  
FCCVds3-CP -GLGAF-RTESIL--ANRVI--APTYP-----  
RoCVds3-CP -EFGIF-KTESMI--QNRIM--APTYP-----  
SbPCL8 -SFGAF-ETSCLT--TNYLY--IPTYP-----  
RSCVds3-CP -GIGMF-RTSAMS--TRFNV--VPVYPE-----

RnPV2W57-CP LSLYATLNSSTIKGS-----VKEMNSYLGNGTDDRTFAGHAYDKDPAQW-----  
FestucaEST IALLAHLNSIINTADPRNAVFPKKGKHIPVTANAAQATVFGHHSFPIAAE-----  
MgPCLS1 LALLSDLNSTINDSNN--NPVYPGKGVKHPVADNRNEPVVFAHHRFPPTVDM-----  
AtPCLS1 FALLEDLTXLFTQXPP---VYPKGRGRIIPVTQNT--VSNFGHKTFLGLHASR-----  
AtPCLS1\_No FALLEDLNRLXFTQXPP---VYPKGRGRIIPVTQNT--VSNFGHKTFLGLHASR-----  
AsPCLS1 FALLEDLNRLXFTQXPP---VYPKGRGRIIPVTQNT--VSNFGHKTFLGLHASR-----  
AtPCLS1\_C24 FALLEDLTXLFTQXPP---VYPKGRGRIIPVTQNT--VSNFGHKTFLGLHASR-----  
AaPCLS1-A FALLEDLNRLLSQYPP---VYPKGRGRIIPVTENA--VSTFGHKTFLGLHASR-----  
AaPCLS1-B FALLEDLNRLLSQYPP---VYPKGRGRIIPVTENA--VSTFGHKTFLGLHASR-----  
CrPCLS1 FALLEDLNRLFSQYPP---VYPKGRGRIIPVTEDA--VSTFGHKTFLGSHANR-----  
CbPCLS1 FALLEDLNRLFSQYPP---VYPKGRGRIIPVTEDA--VSTFGHKTFLGSHANR-----  
OkPCLS1-A FALLEDLNRLFSQYPP---VYPKDRRIPATEDA--VSTFGHKTFLGPHAVR-----  
OpPCLS1-A FALLEDLNRLFSQYPP---VYPKDRRIPATEDA--VSTFGHKTFLGPHAVR-----  
OkPCLS1-C FALLEDLNRLFSQYPP---VYPKGRGRIIPVTEDA--VSTLGHKTFLGPHAVR-----  
CPCV-CP LDQLTCFTQACVNNA-----TIGDFVIGDDLFGTFPFDG-----  
FvBV-CP VDSAYSFATDATY-----VFRSAVNDLNVKMEATDPDMPAAET-----  
SsPV-S-CP ISLLNLFGASNAALLT---AMDTAGQWEPPTFAAGGTIAGFAYGAGFATDA-----  
CCRS-VP-CP LDQFMRLISLISPVN-----SGPVQANASHTDTVYTTIFGAPASK-----  
ACD-PV-CP LDQFMRLISLISPVN-----SGPVQANASHTDTVYTTIFGAPASK-----  
WCCV-CP LDQLYRFATLAFDAQLTNYATFEWYSNIFNQDVN-----  
CCV-CP LDQLHYFSQYAVPANQSTYTTTFQWYRNVFQQGLG-----  
BCV-CP LDQLHYFATWTIPA-EQILYTNFQWYRNIIFSLGLG-----  
VCV-CP LDQLYYCATYVGVN-QGDLYPTFTWYRNIIFTRTGA-----  
BrPCLS4 LDQLHHFAT----SDDTDSFQFQWYGNVFSQSSQ-----

BnPCLS4 LDQLYHFAT-----SDDTDSFQFQWYGNVFSQTIQ-----  
BoPCLS4 LDQLHHFAT-----SDDTDSFQFQWYGNVFSQSIQ-----  
RSCV1-dsRNA3 ISRLRSICAAASRNGA---TEDSFLRDID-----GPQYLATLFAQPCSH-----  
BrPCLS5\_Cc ISRLNSVCAAATRPNV---ASQLFLSDVD-----GPNYMANLNFQPCDQ-----  
BrPCLS5\_tu ISRLNSVCAAATRPNV---ASQLFLSDVD-----GPNYMANLNFQPCDQ-----  
BnPCLS5 ISRLNSICAAATRPNV---TPEIFFRDVD-----GPYYMANLFSQPCDQ-----  
BoPCLS5 ISRLNFICAAATRPNV---TPKIFFRDVD-----GPNCMASLFSXPCDK-----  
SpPCLS5 ISRLHSICSIATRPVAV---TEHLICNDVD-----GPRFMATLFSQACVH-----  
StPCLS5 ISRLHSICSIATRPVAV---TEHLICNDVD-----GPRFMATLFSQACVH-----  
SlPCLS5 ISRLHSICSIATRPVAV---TEHLFCN-VD-----GPRFMATLFSQACVH-----  
NtPCLS5-1 ISKLRSTAAAXLRAAT---TETLFFNDVD-----GPCRIATLFGTACNH-----  
RSCV1-CP ISRLRRICETASENGL---NDISFSAHHH-----GPEFISELFGHICDN-----  
HetRV3-ecl-CP LDQLHQLGVLLTANPV---GIDVANQGRVLHHSFLGVPMFDATVAPGNAAQWNSRVAFDA  
RSCV3-CP VATMKDRKKFN-----  
MdPCL7 IANMKRYWR-----  
BCV2ds1-CP TDVMSDRRTEWS-----  
BCV2ds2-CP VSLMDDPNSGWS-----  
FCCVds2-CP -----  
RoCVds2-CP -----  
RSCVds2-CP -----  
MePCLS2 -----  
FCCVds3-CP -----  
RoCVds3-CP -----  
SbPCL8 -----  
RSCVds3-CP -----

RnPV2W57-CP --T-EERAFFLRSFPGMEHALEGTSSFNKDFEFENRFDNLE--VPIPSND--KVK-----  
FestucaEST --S-NFEKWSLVSSGLQYPCPADQRLNETFAE-RYESFN--FPATLATD--DLR-----  
MgPCLS1 --T-DKDRWMLASSGLQYPCPADQRLNETFAE-RYENFS--FPTAVADDEDLS-----  
AtPCLS1 --T-EAEKWSLVLPGLQYPCPADQSLNEAFAD-CYSNFN--FQVTSAAD--NLE-----  
AtPCLS1\_No --T-EAEKWSLVLPGLQYPCPADQSLNEAFAD-CYSNFN--FQVTSAAD--NLE-----  
AsPCLS1 --T-EAEKWSLVLPGLQYPCPADQSLNEAFAD-CYSNFN--FQVTSAAD--NLE-----  
AtPCLS1\_C24 --T-EAEKWSLVSPGLQYPCPADQSLNEAFAD-CYSNFN--FQVTSAAD--NLE-----  
AaPCLS1-A --T-EAEKWSLVSPGLQYPCPADQSLNEAFAD-RYSDFD--FQVTTAAD--NLE-----  
AaPCLS1-B --T-EAEKWSLVSPGLQYPCPADQSLNEAFAD-RYSDFD--FQVTTAAD--NLE-----  
CrPCLS1 --T-EAEKWSLVSPGLQYPCPADQSLNEAFAD-RYSDFD--FQVTTAAD--NLE-----  
CbPCLS1 --T-EAEKWSLVSPGLQYPCPADQSLNEAFAD-RYSDFD--FQVTTAAD--NLE-----  
OkPCLS1-A --T-EAEKWSLVSPGLQYPCPADQSLNEAFAD-RYSDFD--FQVTTAAD--NLE-----  
OpPCLS1-A --T-EAEKWSLVSPGLQYPCPADQSLNEAFAD-RYSDFD--FQVTTAAD--NLE-----  
OkPCLS1-C --T-EAEKWSLVSPGLQYPCPADQSLNEAFAD-RYSDFD--FQVTTAAD--NLE-----  
CPCV-CP --TIGSHRQQRVAFGMTEPVYFNKAAENHAS-MRNLMMA--LPTRLNYDPQATP-----  
FvBV-CP ---RHWSAMMDPVYRNDMIYIPTRVAQNFAA-FSAPLG--LPLRYNYGPDTDI-----  
SsPV-S-CP ---AASDQTLRAGINVPWQHDTAIHRKLVIP-ISRRMS--VPTMNGAKD-----  
CCRS-PV-CP ---D-EATRFAMLTSPARSDFQTTVGLLNGLST--SSNVWRNTLPPFANDGDSQYVITEDDEL  
ACD-PV-CP ---D-EATRFAMLTSPARSDFQTTVGLLNGLAT--SSNVWRNTLPPFANDGDSQYVISEDDDT  
WCCV-CP ---THNARLRLGPQLCGSLFTTQACQDSARAFWNPAFANGFTRIDAANG--PLM-----  
CCV-CP ---AMNRLNRIGPQLCGSLFTTQAYDAARNFNASLNAGITRANANEGQPAFS-----  
BCV-CP ---AGNANNRIGPQLCGSLYSPRAQVDSARAFWNAALSSGITRNTAAEANGAFY-----  
VCV-CP ---NTPALLRMGPNLCGSLFTTSNQFDAARTYWRACFGTGFTRVNVTA--AFT-----  
BrPCLS4 ---GYNKLNRI GPQLCGSLFSTPQQTASARAFWSSVFA-GATRVNAADETARFT-----  
BnPCLS4 ---EYKLNRI GRQLCGSLFATPQQTASARAFWSSVFS-GATRVNAADKATFT-----  
BoPCLS4 ---EYEPH---GPQLCGSLFSTPQQTASARAFWSSVVFV-GATRVNAAGETAPFT-----  
RSCV1-dsRNA3 --T-ASEIANLSSPGSNLSYSGDLRLWKLASA-RLSFVG--PLALLDSAVTDVSD-----  
BrPCLS5\_Cc --S-ENIQANLTPGASLTYSGLRLWQDANH-QLPFLG--IPKSLYVNDTEVDD-----  
BrPCLS5\_tu --S-ENIQANLTPGASLTYSGLRLWQDANH-QLPFLG--IPKSLYVNDTEVDD-----  
BnPCLS5 --S-ENEQANLTPGASLTYSGLRLWQDANY-QLLFLG--SPQSLDVNATEVDD-----  
BoPCLS5 --S-DHELANLTPGASLTYSGLRLWQDAND-RLFLG--SPQSLDVNATKVG-----  
SpPCLS5 --D-ENXLINVASPGASLTYSGLRLWQNAAN-NLSFYD--LPSPLDISVDHVEN-----  
StPCLS5 --D-ENXLINVASPGASLTYSGLRLWQNAAN-NLSFYD--LPSPLDISVDHVEN-----  
SlPCLS5 --D-ENXISVASPGASLTYSGLHLWXNAAN-NLSFYD--LPSPLDISVDHVEN-----  
NtPCLS5-1 --S-ANELINLASPGFSFQATGGLRLWQDAAN-SLSFLN--LPANLNI TEDAVQD-----  
RSCV1-CP --D-LPEQLLLTPGLATYSGLTYLWRQARS-QLQSL--FPEALTVN-DVVPN-----  
HetRV3-ecl-CP GFT-ASGSFIADVPAARHPFFLNRLGSLQITD-YAALIN--VTRPARQNAAVTP-----  
RSCV3-CP ---MVPLPSNYSGRFSLFDWHAEDQICAP-----FQPEGNFNNEDIAM-----  
MdPCL7 --TSTVGSNDNLGRPFXXLLDWHEDCECCSW-----FPRENYTMEDVMV-----  
BCV2ds1-CP --TIPLATNVLGRASWLLDFKQGNAYAW-----FPFESNFTLDELVA-----  
BCV2ds2-CP --TVPLNTNVFGRPGWLLDYDGTDAYAW-----FPMENNYNMCDLIA-----  
FCCVds2-CP ---GHTFGIPTGHNNWPNLYA--QAVDYARK-----FGLHFNVVDYTKKQ-----  
RoCVds2-CP ---DHTFGVPLEHHWPNLYS--QAVDYART-----LGLHFNVVDYKQKQ-----  
RSCVds2-CP ---ASNHLVGNKRNWSQTAYA--EAVRYAKY-----LGMSFSTVDDLKIV-----  
MePCLS2 ---TSNFLLPAGISWNPPAYS--RAVEYAKS-----IGLKF'QPDLVQOM-----  
FCCVds3-CP ---ATQYEGRAQDAFNMTYEQ--NYIPTLKD-----LGIPCKSVEIHDKK-----  
RoCVds3-CP ---ATQYEGRAQDNFNITDYQ--TYIPTFKD-----LGIPCKSVDPHKS-----  
SbPCL8 ---NTQHEGYANAEPYIQLLGIHMLQPSSEN-----XKVPMKAFEPHKS-----  
RSCVds3-CP ---NTKNEGRSHDSINFLEYK--SYLAYFAE-----IGIPTRTIDTRVTP-----

F/WxGSxxL

RnPV2W57-CP -FVDQFCYL-----S-KNLAW-----FRDLVEIASAAAKFFEFGSGTL  
FestucaEST -FLSSFLSM-----N-GDSLW-----FAQVRDVAAAEADRFGNGSGTL  
MgPCLS1 -TLERFFST-----F-DLSLW-----FARVREVAAVEAAYFEFGSGTL  
AtPCLS1 -KISSFLHM-----K-HSMAW-----FNQVKGVADDVAASFEFGSGTL  
AtPCLS1\_No -KISSFLHM-----K-HSMAW-----FNQVKGVADDVAASFEFGSGTL

AsPCLS1 -KISSFLHM-----K-HSMAW-----FNQVKGVADDVAASFEGSGTL  
AtPCLS1\_C24 -KISSFLHM-----K-HSMAW-----FNQVKGVADDVAASFEGSGTL  
AaPCLS1-A -KISSFLHM-----K-RSMAW-----FSQVKGVADDVAASFEGSGTL  
AaPCLS1-B -KISSFLHM-----K-RSMAW-----FSQVKGVADDVAASFEGSGTL  
CrPCLS1 -SISSFLHL-----K-HRMTW-----FTQVKGVADDVAASFEGSGTL  
CbPCLS1 -SISSFLHL-----K-HRMTW-----FTQVKGVADDVAASFEGSGTL  
OkPCLS1-A -SISSFLHM-----K-HNMAW-----FTHVIGVANDVAASFVGSGL  
OpPCLS1-A -SISSFLHM-----K-HNMAW-----FTHVIGVANDVAASFVGSGL  
OkPCLS1-C -SISSFLHM-----K-HNMAW-----FTQVIGVANDVAASFEGSGTL  
CPCV-CP LTLNEMFRF-----NTDKRW-----FSRIISTMTVYSKFFDGSVTL  
FvBV-CP -GLSHFLYL-----SGGKHDY-----LNRLAPVFARYSQYFVNSKSL  
SsPV-S-CP -SPRTYCGI-----DGQFHW-----FHKAIGAVSQEAKYFAGSTTL  
CCRS-PV-CP LDLDQVFGFRGIGPYADRPYGW-----FAQVIRVMQPYSDFFKDTVSL  
ACD-PV-CP LDLDQVFGFRGIGNHADRPYGW-----FAQVIRVMQPYSDFFKDTVSL  
WCCV-CP -AFPQLLGFISQDGL--QSNW-----FMHISLIMHKYAQYFNGSVPL  
CCV-CP -NYRQLFGFESQTGVL--QVNW-----FTSVSIAMNKYTOFFNGSVPL  
BCV-CP -TYAQLLGFISQNGTL--QLDW-----FQQVAVVMQKYTOYFNGSTPL  
VCV-CP -NYLQLLGLRSQTGEP--QTAW-----FQNVMTVMQKYAQHFNGSVPL  
BrPCLS4 -SILNLFGEFENS-----QTNW-----FQY--XMHNYSKYFNGSVPL  
BnPCLS4 -SVLNLFGFEFS-----QTNW-----FQHTCMVMHNYSKYFNGSVPL  
BoPCLS4 -SILNLFGEFENS-----QTNW-----FQYTCIVMHNYSKYDYGSVPL  
RSCV1-dsRNA3 -NWTAFILGF-----S-ERSDW-----FGSINAMMVKYCQFWKGSSTL  
BrPCLS5\_Cc -NWLTFRL-----S-EDATW-----FGSLAAMMAKYCQFWKGSVPL  
BrPCLS5\_tu -NWLTFRL-----S-EDATW-----FGSLAAMMAKYCQFWKGSVPL  
BnPCLS5 -NWSNFLRL-----S-GHSTW-----FGKVAAMMGKYCQFWKGSVPL  
BoPCLS5 -NWTFLRL-----S-EHSTW-----FGSVATMMGKYCQFWKGSVPL  
SpPCLS5 -DWISALRM-----N-NSSSW-----LGPLAAMMAKYCQFWKGSVPL  
StPCLS5 -DWISALRM-----N-NSSSW-----LGPLAAMMAKYCQFWKGSVPL  
SlPCLS5 -DWISALRM-----N-SSEFW-----LGPLAAMMSKYCQFWKGSVPL  
NtPCLS5-1 -SWISALRL-----K-EDSTW-----FGPLAAMMSKYCQFWKGSVPL  
RSCV1-CP -TWTSTFLCL-----D-NDDSW-----FSLAAMMNKYCQYWHGSDPL  
HetRV3-ecl-CP -SWTQFLGL-----D--NMPF-----FLQVVRIMSWSKYFWQSSDL  
RSCV3-CP AFVLGTACTSLIGMRD--RDDWQFYPNANVPAH-----FNPHTAQRIPTPRMY-GSYEV  
MdPCL7 AYILGAACTPNLGRD--VDDWQNGI V PEN-----VNPLSYDRVKYXHFY-GGYEV  
BCV2ds1-CP PYILGIPCTPRLGPRD--EDHYQHWHNDPPLSTDGNIIILNPLAYVRSSERKFF-GNAEY  
BCV2ds2-CP PHILATPCTAKLGIYD--ADIWQNCPCGNIPITA-----TTARTARESERREY-GSAET  
FCCVds2-CP -----GTAWWLLRQHFEEDGIFELQLPLPEV-----NFTSSMALT  
RoCVds2-CP -----GTAWWLLRQHYEDHVFELQVPLPEV-----NFTSAMAIT  
RSCVds2-CP -----GSSWWLFKPDVTDGLLSIRCPLPED-----NYTLGATV  
MePCLS2 -----ASTWWLYRPVLTGLHFCLCPLPEE-----NFTLNTAVL  
FCCVds3-CP -----GTAWWSYKIHNHDGTSDLVCLLPT-----NYSPLAVAT  
RoCVds3-CP -----GSAWWTYKLNNAHGTTDLVCTI PPT-----NYSDLGVAL  
SbPCL8 -----GMPWWTYRVSTVYSTHDLICALPPT-----LCTYFSAEL  
RSCVds3-CP -----GNAWWTYRTSYDGDVYDLKINFPL-----HFNDHLAN

:

RnPV2W57-CP ADC-----SPV-GPPVCQ-----VQTTISNVDLH--  
FestucaEST ADC-----PPT-GIVSNQ-----ICVEYIAPRTDVT  
MgPCLS1 ADC-----SPGGIVSNQ-----IVVAYQGTSTPPI  
AtPCLS1 ADC-----SPH-GLVANQ-----VMVVLSTPEHLPE  
AtPCLS1\_No ADC-----SPH-GLVANQ-----VMVVLSTPEHLPE  
AsPCLS1 ADC-----SPH-GLVANQ-----VMVVLSTPEHLPE  
AtPCLS1\_C24 ADC-----SPH-GLVANQ-----VMVVLSTPEHLPE  
AaPCLS1-A ADC-----SPH-GLVSNQ-----VMVCLSTPEQVPG  
AaPCLS1-B ADC-----SPH-GLVANH-----VMVCLSTPEQVPG  
CrPCLS1 ADC-----PPH-GLVANQ-----VMVCLSKPKNLPD  
CbPCLS1 ADC-----PPH-GMVANQ-----VMVCLSKPKNLPD  
OkPCLS1-A ADC-----SPH-GPVANQ-----VMVCLSNPEHLPD  
OpPCLS1-A ADC-----SPH-GPVANQ-----VMVCLSNPEHLPD  
OkPCLS1-C ADC-----LPH-GLVANQ-----VMVCLSNPEHLPD  
CPCV-CP YEC-----PPV-GPPAAQ-----VSMVRTQPMRFEA  
FvBV-CP QEC-----SPV-GSAPGQ-----INGTLTDAIPVPT  
SsPV-S-CP ANI-----NPS-TGPSAV-----VETTVA-----  
CCRS-PV-CP GSV-----TTT-GTGISY-----IRTKYVDTKQKNK  
ACD-PV-CP GSV-----TTT-GTGISY-----VRTKYVATRQKNK  
WCCV-CP KSI-----SPV-GIGASV-----IYGTPLEDTNVRD  
CCV-CP KSI-----LPT-GIGAVV-----IYGTPMNNPSTRT  
BCV-CP KSI-----STI-GIGAVA-----VIGAPTPDPATRD  
VCV-CP KSI-----DLT-GIGAVA-----LTGTPVNNTAVRD  
BrPCLS4 SSI-----LPT-GLGAVA-----VRGVPSVNEATRS  
BnPCLS4 SSI-----LPT-GLGAVA-----VRGVPSVNEATRS  
BoPCLS4 SSI-----LPT-ELGAVA-----VRGAPSINEATRS  
RSCV1-dsRNA3 YEC-----SPA-SSAAGS-----VRCIAT-DTNI FT  
BrPCLS5\_Cc YDC-----SAS-DSAAGA-----VRCTAT-DTDVFD  
BrPCLS5\_tu YDC-----SAS-DSAAGA-----VRCTAT-DTDVFD  
BnPCLS5 YDC-----SAS-SSAAGA-----VRCTAT-DTDVFD  
BoPCLS5 YDC-----SAS-SSGAGV-----VRCTAT-DTDVFD  
SpPCLS5 ADC-----SPD-GSATGS-----VRCVATGGTNV FQ  
StPCLS5 ADC-----SPD-GSATGS-----VRCVATGGTNV FQ  
SlPCLS5 ADC-----SPD-CSATGS-----VRCVSTGGTNV FQ  
NtPCLS5-1 AEC-----SPN-SSAAGS-----VRCLLSGHSNLFQ  
RSCV1-CP SSI-----PAD-GSAAGS-----MICNELNGSS IYR  
HetRV3-ecl-CP MSF-----TPS-GHTGGQ-----NTFELVNPPAS--

RSCV3-CP RSY-----ETDHDYYIPNSAGVTA-----FLSGPSTSRKRSR  
MdPCL7 RTIERRQIVVKLDEETLDRVLEDXRFYSGYAVGDGKQRXIPFVVRGXTOGPPPNKRKKTK  
BCV2ds1-CP RTMEYNSYTONFEAY-----MPRVTTSTQA-----KNKRKKDKA  
BCV2ds2-CP RTIEQRNYTVNFPPELL-----KPR-DTGARA-----  
FCCVds2-CP LSLFLNA-----EEV-NATSEI-----FDLTPVGADI---  
RoCVds2-CP HTLFLLEG-----EAA-DPSNAV-----FDLTPVGADT---  
RSCVds2-CP FMLFYHD-----VGS-DPAIDL-----FNIDSLGNDD---  
MePCLS2 RTLFCND-----ASG-GFMVNL-----FDLTPVGTDT---  
FCCVds3-CP RMLFLAT-----QDD-SDECTD-----FIEWPEDLGD---  
RoCVds3-CP RSLFLAT-----AAD-SDECSE-----IIAWPEGTAD---  
SbPCL8 RSLLLIP-----DPDHNNVQE-----IVTHPQTVAHHGF  
RSCVds3-CP AIMFLGN-----SGA-DRNNAS-----IITTKTDDQD---

RnPV2W57-CP -----TAPTSISKGKSFY-----AEAHMKLTTTSRT-MDQLSMIMAS  
FestucaEST -----APTHNADPLSLF-----PFTIKLHSTARN-LPALSEVMAC  
MgPCLS1 -----APTHSFDTRALF-----PFSIRLHTTVRS-IPELAEAMAA  
AtPCLS1 -----SPNCIADKRATY-----EFGYQLKSTVRN-LPPLAEALAA  
AtPCLS1\_No -----SPNCIADKRATY-----EFGYQLKSTVRN-LPPLAEALAA  
AsPCLS1 -----SPNCIADKRATY-----EFGYQLKSTVRN-LPPLAEALAA  
AtPCLS1\_C24 -----SPNCIADKRATY-----EFGYQLKSTVRN-LPPLAEALAA  
AaPCLS1-A -----SPTCIADKRATY-----EFSYQLKSTARN-LPPLAEAVAA  
AaPCLS1-B -----SPTCIADKRATY-----EFSYQLKSTARN-LPPLAEAVAA  
CrPCLS1 -----PPTCIADKRATY-----EFSYKLLKSTAFN-LSPLTEAVAA  
CbPCLS1 -----PPTCMADKRATY-----EFSYKLLKSTAFN-LPPLTEAVAA  
OkPCLS1-A -----APTCIADKRATY-----EFSFKLKSTARN-LPPLAQAVAA  
OpPCLS1-A -----APTCIADKRATY-----EFSFKLKSTARN-LPPLAQAVAA  
OkPCLS1-C -----PPTCIADKRATY-----EFSYKLLKSTALN-LPPLAETVAA  
CPCV-CP SNTAQAMETESFESTAISV-----NRSLSLHDEKVALAAL  
FvBV-CP ISGTTVYTPSTLA-----ALVTPWSSTTIYTHVNL-LPEFFEHQAA  
SsPV-S-CP --VPAALIPQATAWYEGYP-----FNLNLTVNTRVRS-ISETDVKIGT  
CCRS-PV-CP IILVHAVTTRKVRVYQTGSTL-----RYHIPEFTGITTIHLHAEF-LDLVTEQAGI  
ACD-PV-CP IILVHAVTTRKVRVYQTGSTL-----RYDIPEFTGITTIHLHSEEF-LDLVTEQAGI  
WCCV-CP WLYPAAAAIAPFRSTRFLP-----RRELPA TLAVRFAHADHE-IEEQAEQYSI  
CCV-CP WVYPPDGTGIEPFTTTRYPP-----RREIPDALSIOFSHADHE-LEEQAEQYAM  
BCV-CP WFYPAATGIEPFLCSRFP-----RREIPNTLGMIFSHADHE-LEEQAEQYAI  
VCV-CP WLYPPNANIEPFTTGRFNP-----RREIPAQLRIRFSDHE-LELQAEQYAI  
BrPCLS4 FLYPTNAEIEPFTSSRFNP-----RRLIPLAMSVTFQHCEYEGLEEAERYAI  
BnPCLS4 FLYPTNAEIEPFTSSRFNP-----RRLIPLAMSVTFQHCEYEGLEEAERYAI  
BoPCLS4 FLYPTDAEIEPFTSSRFNP-----RRQIPLAMSVTFKHCENDGLGEEVERVYAI  
RSCV1-dsRNA3 PPEWNAQQGAHTSFTHGDA--NQAGHYNMRHN---AHLTFQATTSVHE-LPLAHYYSAL  
BrPCLS5\_Cc PPHWIAQAGNRTATQHANP--HQVGHYSMRSN---LSLVFKAATSVED-ISRAHIFAAN  
BrPCLS5\_tu PPHWIAQAGNRTATQHANP--HQVGHYSMRSN---LSLVFKAATSVED-ISRAHIFAAN  
BnPCLS5 PPHWTAQAGNHNATQHANA--HQVGHYSTRSY---LSLVFKAATSVED-ISRAHISAAN  
BoPCLS5 PPHWTTQARNHNSTQHANP--HQVGHYSMRSN---LSLVFKAATSVED-ISMANIFTAN  
SpPCLS5 GPVWNTXGSHNNFQHGNA--NQVGHSMRSN---LHLMFDASTTIHD-IPDAHVPAL  
StPCLS5 GPVWNTXGSHNNFQHGNA--NQVGHSMRSN---LHLMFDASTTIHD-IPDAHVPAL  
SlPCLS5 GPVWNTNEAGMHNNFQHGNA--NQVGHYTMRSN---LHLIFEASTTIHD-IPYSHVYPAL  
NtPCLS5-1 GPVWSAQTGAHTNTQCDHA--DEAGHYCLRST---ANTRFTATTSIVD-LPNAHYAAS  
RSCV1-CP LAQWTAPIMDPPADEDAPPVIAEPGYYPNPN---PVLIFDARTCIED-ISSAHMFSAM  
HetRV3-ecl-CP -----LNAMTAGGRFYT-----LDLKSCKGYSRNP-APDADCFDAA  
RSCV3-CP TTSSTPGSLVICK-----  
MdPCL7 DKVSVSNAAIQTGSEYSEAITIQTGTESSKATAIQTGSESFKAEASTTV-DQFQIVDWTY  
BCV2ds1-CP APEQLSTGQGDGSSSSKDA-----EMSTEESEAPPPKIPRPRQI--HQFRLIDWVY  
BCV2ds2-CP ---LVTTTQRASTSGSVEP-----TTGAQPEPETPTFTQITF-RQFRILDYCY  
FCCVds2-CP -----  
RoCVds2-CP -----  
RSCVds2-CP -----  
MePCLS2 -----  
FCCVds3-CP -----  
RoCVds3-CP -----  
SbPCL8 RMKALHTXNRHQVNSCTLA-----  
RSCVds3-CP -----

**GpFW**

RnPV2W57-CP ASHL-NLRYAHATH-----SIQSRTSGPFW--SLNPIESSVTDESSLIQ  
FestucaEST TAQT-HIRM-FPTH-----PYFGQFGNHRG-----CGPFW--EIRPIESSPKDESSYLS  
MgPCLS1 FAQT-NISM-FATH-----PWLHAIDENSRD-----GPFW--QIRPEKSSIDQTSYLS  
AtPCLS1 FSQT-YIRM-FPNH-----PFFGTFGSKTLD-----HGPFW--KIRPIGSSLTDNSSYLT  
AtPCLS1\_No FSQT-YIRM-FPNH-----PFFGTFGSKTLD-----HGPFW--KIRPIGSSLTDNSSYLT  
AsPCLS1 FSQT-YIRM-FPNH-----PFFGTFGSKTLD-----HGPFW--KIRPIGSSLTDNSSYLT  
AtPCLS1\_C24 FSQT-YIRM-FPNH-----PFFGTFGSKTLD-----HGPFW--KIRPIGSSLTDNSSYLT  
AaPCLS1-A FSQT-HIRM-FPNH-----PFFGTFGSKTLD-----HGPFW--KIRPIGSGLPDNSSYLT  
AaPCLS1-B FSQT-HIRM-FPNH-----PFFGTFGSKTLD-----HGPFW--KIRPIGSGLPDNSSYLT  
CrPCLS1 FSQT-HVRM-FPNH-----PFFGTFGSKTLD-----HGPFW--NRRPIGSSLTDSSNLT  
CbPCLS1 FSQT-HVRM-FPNH-----PFFGTFGSKTLD-----HGPFW--NRRPIGSGLTDSSILT  
OkPCLS1-A FSQT-HIRM-FPNH-----PFFGTFGSKTLD-----HGPFW--SRRPIESSLTDNSSYLT  
OpPCLS1-A FSQT-HIRM-FPNH-----PFFGTFGSKTLD-----HGPFW--SRRPIESSLTDNSSYLT  
OkPCLS1-C FSQT-HIRM-FPNH-----PFFGTFGSKT-----SLTDNSSYLT  
CPCV-CP INET-----LVSTGDQPIYAAQRLGPFW--NISPTRRQAYRFDPSFV  
FvBV-CP LTNV-NVTE-----HGAAPTFGTTATTLNGSFV--RMKPHYRESPPINVTKN  
SsPV-S-CP FAATCNI-----TGNFNTRWNGSSVFAGDFFVAATNPINFENPTEVNAIA  
CCRS-PV-CP LTQL-NSDWTDINK-----DVTDTSGPDYTSHTVGPFI--SIPDSGRTSQYKVSNT

ACD-PV-CP LTQL-NSDWT DINK-----DVT DTSNPDFKSTHVGP I F---SIPDSRRTSQYNVNSNT  
WCCV-CP LCHT-NMKWYVNNA-----TQNNHTAIEGNYIHQGEY W--NFTPF RYSPP-VSLKTQ  
CCV-CP LTHT-NIKWYQNL E-----TQNNWTAIAAGGLYLGDY W--NMMPYRFSAP-LHYKSQ  
BCV-CP LHTT-NIRWSPSVV-----AQNAWTA VNDGASRNGDY W--IMMNYRFSR- I SLKTQ  
VCV-CP AAHT-NIRWAANIA-----TQHERTA INPAHLHQGDY W--NMTPF RHTGH-LGLKTQ  
BrPCLS4 VAHT-NLRWPLENG-----DQNEWTLVNSCVTHRGDVW--SFMCHRFSNPVVS LHFQ  
BnPCLS4 VAHT-NLRWPLENG-----DQNEWTLVNSCVTHRGDVW--SFMCHRFSNPVVS LHFQ  
BoPCLS4 VAHT-NLRWPLENG-----DQNEWTRVNSCVTHRGDVW--SLMCHRFSNPVVS LHLQ  
RSCV1-dsRNA3 RSCV1-NL-----AESEAM--AATC-RGTFW--NIFPDAYTRSGIQIYPG  
BrPCLS5\_Cc TYNI-YL-----SPNDDGH--GALR-RGVFW--SIHPDAFTKSGIEIYPG  
BrPCLS5\_tu TYNI-YL-----SPNDDGH--GALR-RGVFW--SIHPDAFTKSGIEIYPG  
BnPCLS5 TYNI-YL-----SPNDDGHAGRAQYWRGMFW--SIYPDAYTRSGIKT-PR  
BoPCLS5 TYNI-YL-----SPNDDGH--RALH-RGMFW--NIYPDAYTRSGIETYPD  
SpPCLS5 TYHF-NL-----SPNDAGR--TVLN-EGPFW--DVHPPAFQNSG IQVYQG  
StPCLS5 TYHF-NL-----SPNDAGR--TVLN-EGPFW--DVHPPAFQNSG IQVYQG  
SlPCLS5 TYRF-NL-----SPSVAGL--TVLN-EGPFW--DVHPPALQKSGVQVYQG  
NtPCLS5-1 TYQF-NL-----AATAAEQ--ANLL-QGPFW--TVVPDAWTKMDISVFGQ  
RSCV1-CP TFHP-NL-----IPYGANR--ANFL-KGQFW--NCHPPSYSA PAHQVYPA  
HetRV3-ecl-CP LGPI-NLSWTPADMFAGKLARNGAIADETTL SNTRTAGPYF--SETIVDITGE- INPSSA  
RSCV3-CP -----YICLYPYRLHYLPVHINIS  
MdPCL7 SHRV-ILSM-----DSDTRSQSLW-----  
BCV2ds1-CP HSRVILGA-----DKAMQRALW-----  
BCV2ds2-CP LAKVIHKS-----NSQMINKALR-----  
FCCVds2-CP -----YGYIMREPHLGINVSTFEV  
RoCVds2-CP -----YGYILREPHFGINVTTYQV  
RSCVds2-CP -----YGSFIRNPRDGFNASSYYA  
MePCLS2 -----YGSMLRNPQYEV DVTTYYA  
FCCVds3-CP -----YGTQLKEAPPNSNVRAFLA  
RoCVds3-CP -----FGTNLRENPPNSNIRAFLA  
SbPCL8 -----TSLMYFGSSLRDSIEAENLKAPVS  
RSCVds3-CP -----YGWYVKDIREGEQARAFAA

RnPV2W57-CP V--RQTVKMMMSKV-----  
FestucaEST Y--KGVVRKLLKPK-----  
MgPCLS1 L--KDIIRGLIRHKSTLIL-----  
AtPCLS1 I--PSIVKQAFK--GPAT-----  
AtPCLS1\_No I--PSIVKQAFK--GPAT-----  
AsPCLS1 I--PSIVKQAFK--GPAT-----  
AtPCLS1\_C24 I--PSIVKQAFK--GPAT-----  
AaPCLS1-A I--PSIVKQAFKANGPAT-----  
AaPCLS1-B I--PSIVKQAFKANGPAT-----  
CrPCLS1 I--PSIVKQAFKSKVPAT-----  
CbPCLS1 I--PSIVKQAFKSKVPAT-----  
OkPCLS1-A I--PSMVEQAFKSKGPAA-----  
OpPCLS1-A I--PSMVEQAFKSKGPAA-----  
OkPCLS1-C I--PSMVKQAFKSKGTAT-----  
CPCV-CP L--PSVIRDHYALT TATR-----  
FvBV-CP L--FNIISNEMFAEPTS-----  
SsPV-S-CP MAQPTMTLSLYRPKGGEANSDD--  
CCRS-PV-CP I--APLISGYHTPSALRFE----  
ACD-PV-CP I--APLISGYHTPSALRFE----  
WCCV-CP F--AQVIASRYHQQAANRAE----  
CCV-CP Y--AQVIASRYHQQAANKAE----  
BCV-CP F--AQVIASRYHQQAANRVD----  
VCV-CP Y--AQLIASRYHQQAANRVD----  
BrPCLS4 L--GQVIVSRYH LHELYLDD----  
BnPCLS4 L--GQVIVSRYH LHELYLDD----  
BoPCLS4 L--GQVLVSRYH LHELYLYI----  
RSCV1-dsRNA3 I--PALIARDYHSETRIESERQNA  
BrPCLS5\_Cc V--FSSLARDYHSHSPIYPD----  
BrPCLS5\_tu V--FSSLARDYHSHSPIYPD----  
BnPCLS5 V-----  
BoPCLS5 V--IPSLARDYHSYSRIDSDGL-S  
SpPCLS5 V--TLTIARDYHSDTRIDSEHQ--  
StPCLS5 V--TLTIARDYHSDTRIDSEHQ--  
SlPCLS5 V--TLTIARDYYSGTRIDSEHQ--  
NtPCLS5-1 V--LTSIARDYHSDV RIDAERE--  
RSCV1-CP V--SALIAREYHSETNLSSDK--  
HetRV3-ecl-CP Y--AGILNQYYYSSVALKN----  
RSCV3-CP LFN-----  
MdPCL7 -----EIVQNLD C  
BCV2ds1-CP -----DFIHAGATPSHQPRP  
BCV2ds2-CP -----NFIQKGASKKTE----  
FCCVds2-CP IDESAKE--IVSNV-----  
RoCVds2-CP IDGSAQE--IVSNV-----  
RSCVds2-CP ISSEGTDEMWKSSA-----  
MePCLS2 IEDAGVNLYSLG-----  
FCCVds3-CP LCHGPLEEWSNGHA-----  
RoCVds3-CP LCHGPLEEWSNGHA-----  
SbPCL8 L-----  
RSCVds3-CP LCQWDPRYWNEKNNV-----
